# Supplementary material for: Heritable pattern of oxidized DNA base repair coincides with pre-targeting of repair complexes to open chromatin
Source: PubMed Central journal article supplement — Nucleic Acids Res. 2020 Dec 9;49(1):221–43. doi: 10.1093/nar/gkaa1120 (PMC7797072; doi:10.1093/nar/gkaa1120), 2020-12-09
Supplement: gkaa1120_supplemental_file.pdf [file gkaa1120_supplemental_file.pdf]

# **Heritable Pattern of Oxidized DNA Base Repair Coincides with Pre-Targeting of Repair Complexes to Open Chromatin**

Albino Bacolla, Shiladitya Sengupta, Zu Ye, Chunying Yang, Joy Mitra, Ruth B. De-Paula, Muralidhar L. Hegde, Zamal Ahmed, Matthew Mort, David N. Cooper, Sankar Mitra, and John A. Tainer

**Supplementary Information**

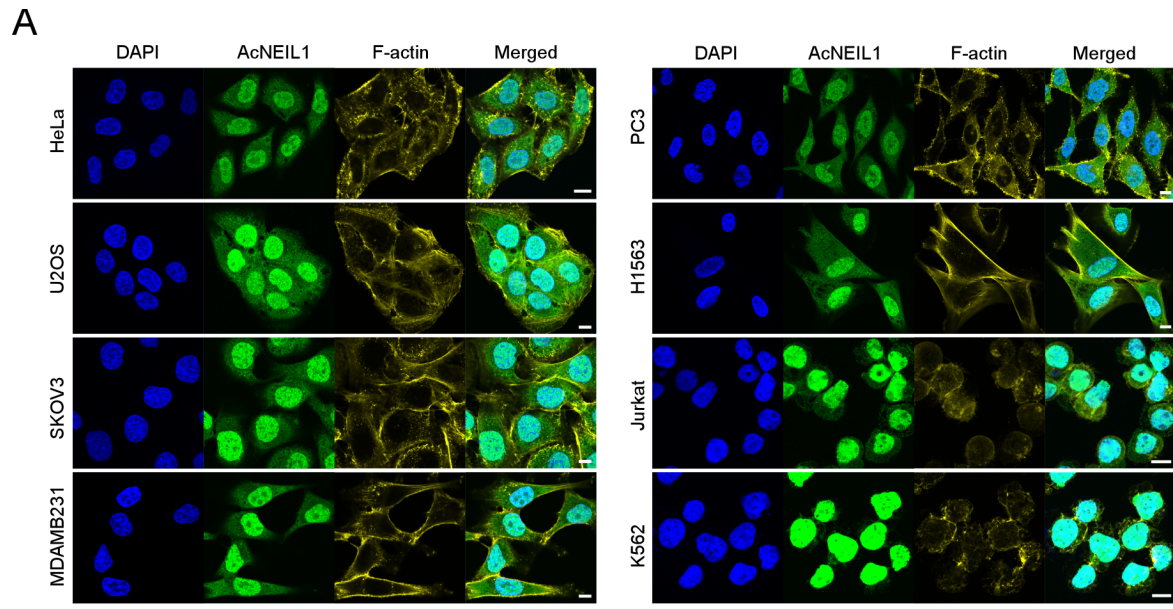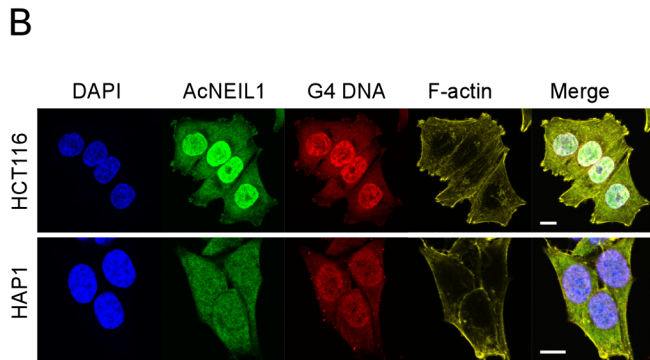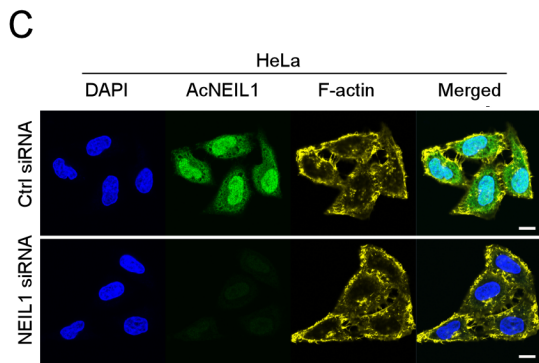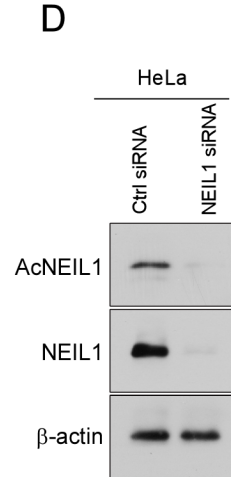

Supplementary Figure 1

**Supplementary Figure 1.** AcNEIL1 is predominantly localized in the nucleus. **(A)** Confocal microscopy images of eight cell lines stained with DAPI for nuclear DNA (blue), anti-AcNEIL1 specific antibody (green) and phalloidin for cytoplasmic cytoskeleton (yellow) and merged images, displaying nuclear accumulation of AcNEIL1; scale bar, 10  $\mu\text{m}$ . **(B)** Confocal microscopy images of HCT116 and HAP1 cells stained with DAPI for nuclear DNA (blue), anti-AcNEIL1 specific antibody (green), a G4 DNA structure-specific antibody (red) and phalloidin for cytoplasmic cytoskeleton (yellow) displaying cell type-specific colocalization patterns of AcNEIL1. Scale bar, 10  $\mu\text{m}$ . **(C)** Confocal microscopy images of HeLa cells stained with DAPI for nuclear DNA (blue), anti-AcNEIL1 specific antibody (green) and phalloidin for cytoplasmic cytoskeleton (yellow) plus merged images, showing the efficient knockdown of NEIL1 by siRNA; scale bar, 10  $\mu\text{m}$ . **(D)** Immunoblotting of AcNEIL1 and total NEIL1 after siRNA treatment in HeLa cells.

A

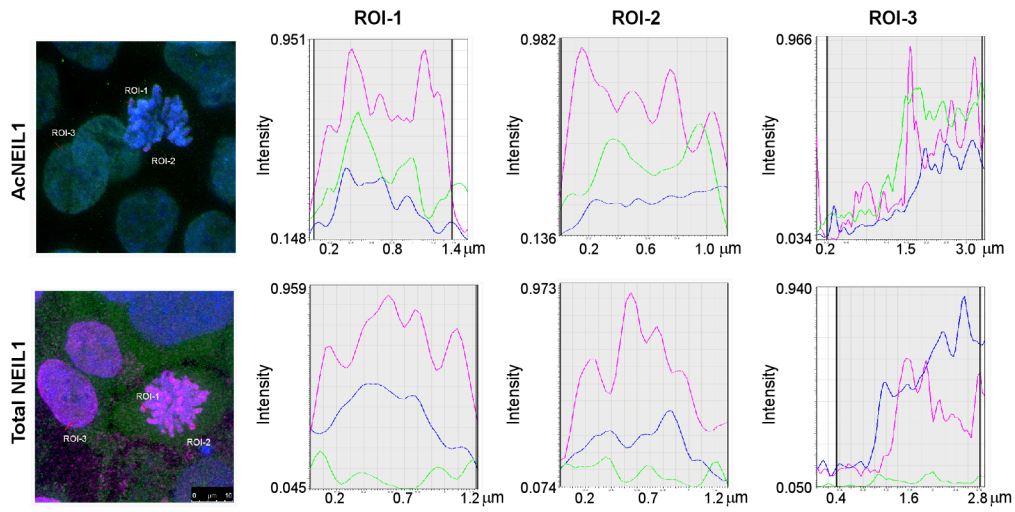

B

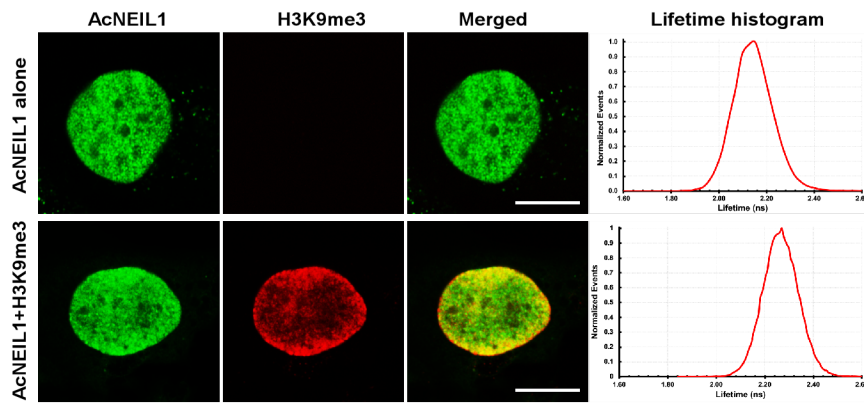

C

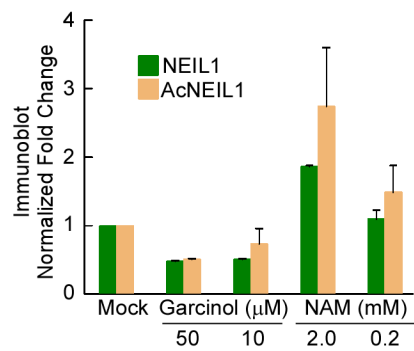

Supplementary Figure 2

**Supplementary Figure 2.** AcNEIL1 binds within active chromatin domains. **(A)** Co-localization measurements between AcNEIL1 and H3K27Ac using Leica Quantification tools on merged STED images. Three regions of interest (ROI) from respective images were selected and analyzed. Normalized intensities (y axis) for each ROI were plotted against distance (x axis). The results show that AcNEIL1 has a high degree of co-localization with H3K27Ac; green peak (AcNEIL1) superimposing on magenta (H3K27Ac) and DNA (blue). This is in contrast to total-NEIL1, which displays a diffuse distribution with ROI quantification showing limited co-localization with DNA and H3K27Ac. Note the relatively low intensities of total-NEIL1 signal as compared to H3K27Ac and DNA in the same focal point. **(B)** Left, Immunofluorescence staining of AcNEIL1 (top) and AcNEIL1 plus H3K9me3 (bottom) in HCT116 cells. Right, FLIM lifetime histogram of labelled AcNEIL1 (top) and labelled AcNEIL1 and H3K9me3 (bottom). FLIM samples were prepared as described in Materials and Methods; images were captured using a Leica SP8 FALCON and analyzed with a Leica FLIM analysis software. Scale bar, 10  $\mu\text{m}$ . **(C)** Quantitation of immunoblotting (IB) of NEIL1, AcNEIL1 and histone H3 from the chromatin fractions of HCT116 cells. Intensities of IB bands were expressed as normalized fold-change and shown as mean and standard error from the mean from 2 independent experiments.

**A**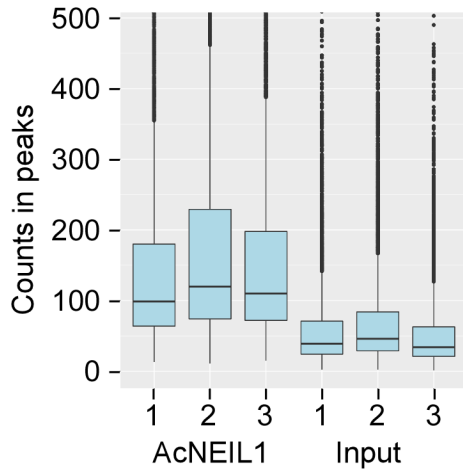**B**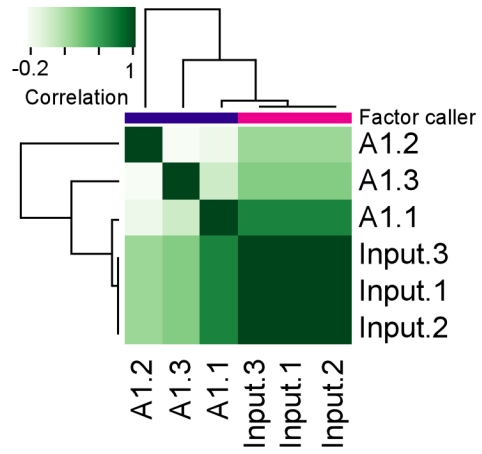**C**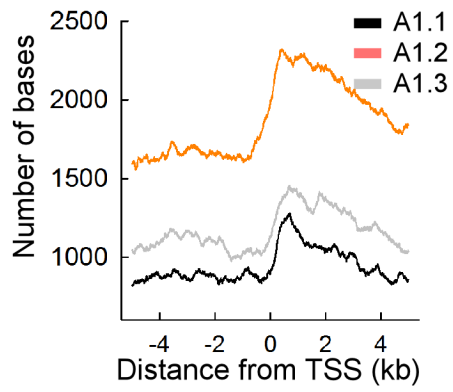**D**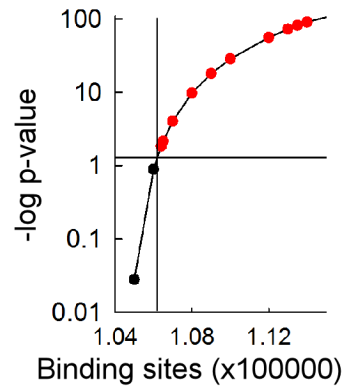**Supplementary Figure 3**

**Supplementary Figure 3.** ChIP-seq quality-control metrics indicate specific and reproducible sequence amplification. **(A)** Bar plot of the number of reads overlapping with peaks for the AcNEIL1 and Input replicates from CHIPQC. **(B)** Peak correlation heatmap for the AcNEIL1 and control replicates based on the co-occurrence of peaks. **(C)** Bp-resolution of peak enrichment at TSSs. PIC summits were extended by  $\pm 100$  positions and plotted as a function of distance from any TSS within  $\pm 5$  kb. **(D)** p-values for the PIC overlap between replicates obtained with CHIPpeakAnno. The p-value for two overlapping peak sets is obtained from a hypergeometric test and depends on the total number of binding sites genome-wide. If this number is unknown, parameter “totalTest” will set this equal to:  $hg38\_size * (2\%(\text{coding\_DNA}) + 1\%(\text{regulation\_Region})) / (2 * \text{average\_peak\_width})$ , which for the weakest pair, A1.2 and A1.3, corresponded to 113900 and a p-value of  $8.2 \times 10^{-90}$ . The corresponding p-values for A1.1 with A1.3 was 0, and that of A1.1 with A1.2 was  $9.7 \times 10^{-114}$ . The plot displays the p-values for various number of binding sites. Red, significant p-values; black, non-significant p-values. Cross section, minimum number of binding sites for a significant p-value, 106400.

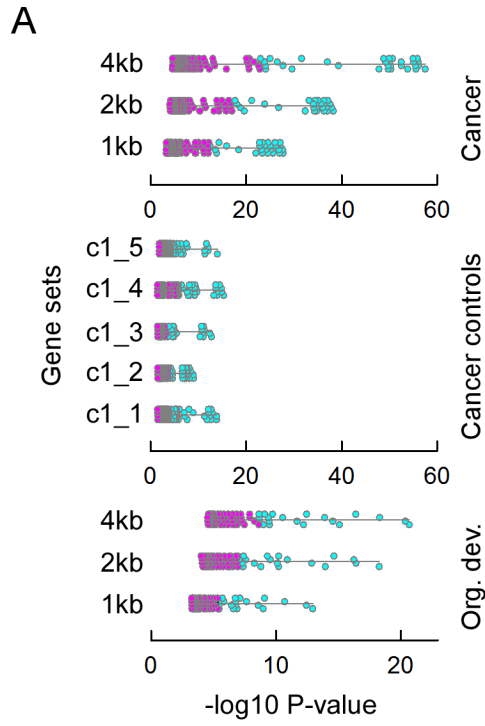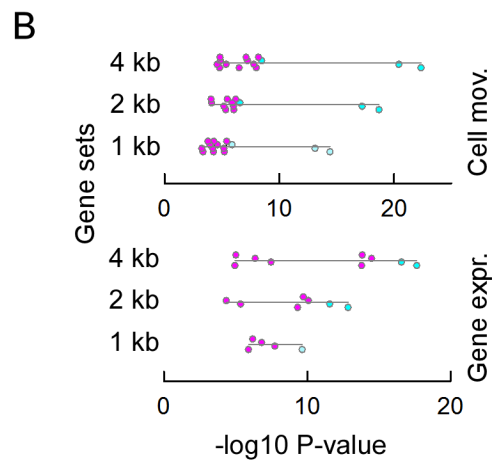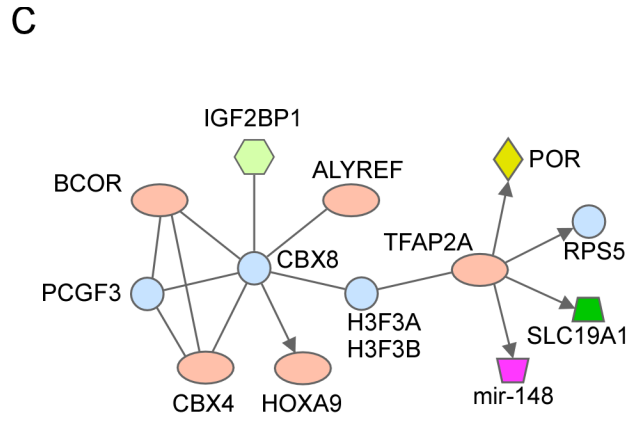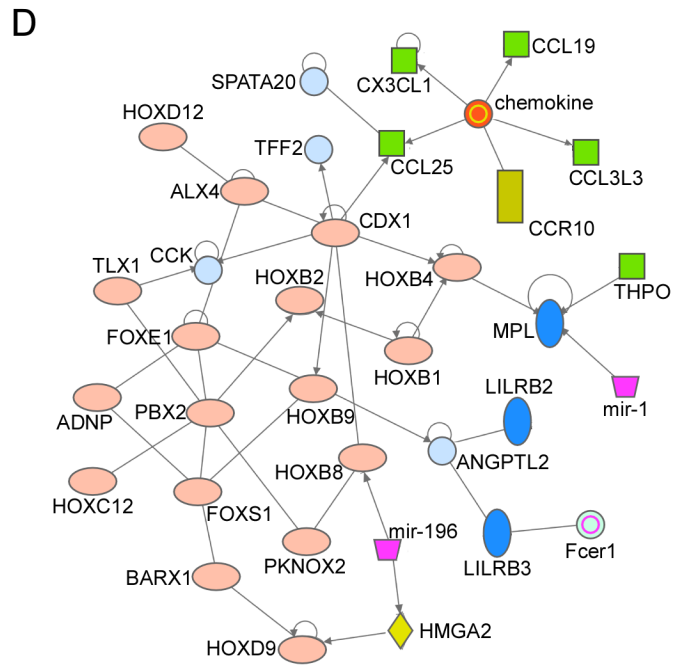

**Supplementary Figure 4**



**Supplementary Figure 4.** AcNEIL1 punctuates TSSs of genes involved in cancer and development. **(A)** Ranked p-values from IPA enrichment in gene sets associated with cell movement (top) and gene expression (bottom) for genes with PICs within 1, 2 and 4 kb of TSSs. Upper 25% (blue) p-values are distinguished from the lower 75% (magenta). **(B)** Ranked p-values from IPA enrichment in gene sets associated with cancer (top) or organismal development (bottom) for genes with PICs within 1, 2 and 4 kb of TSSs, and in gene sets associated with cancer for control genes (middle). Upper 25% (blue) p-values are distinguished from the lower 75% (magenta). **(C)** IPA pathway analysis for genes with PICs focused on *Hox*-genes interactions. **(D)** IPA pathway analysis for genes with PICs focused on the interactions of the *CBX8* cancer-related gene.

**A**

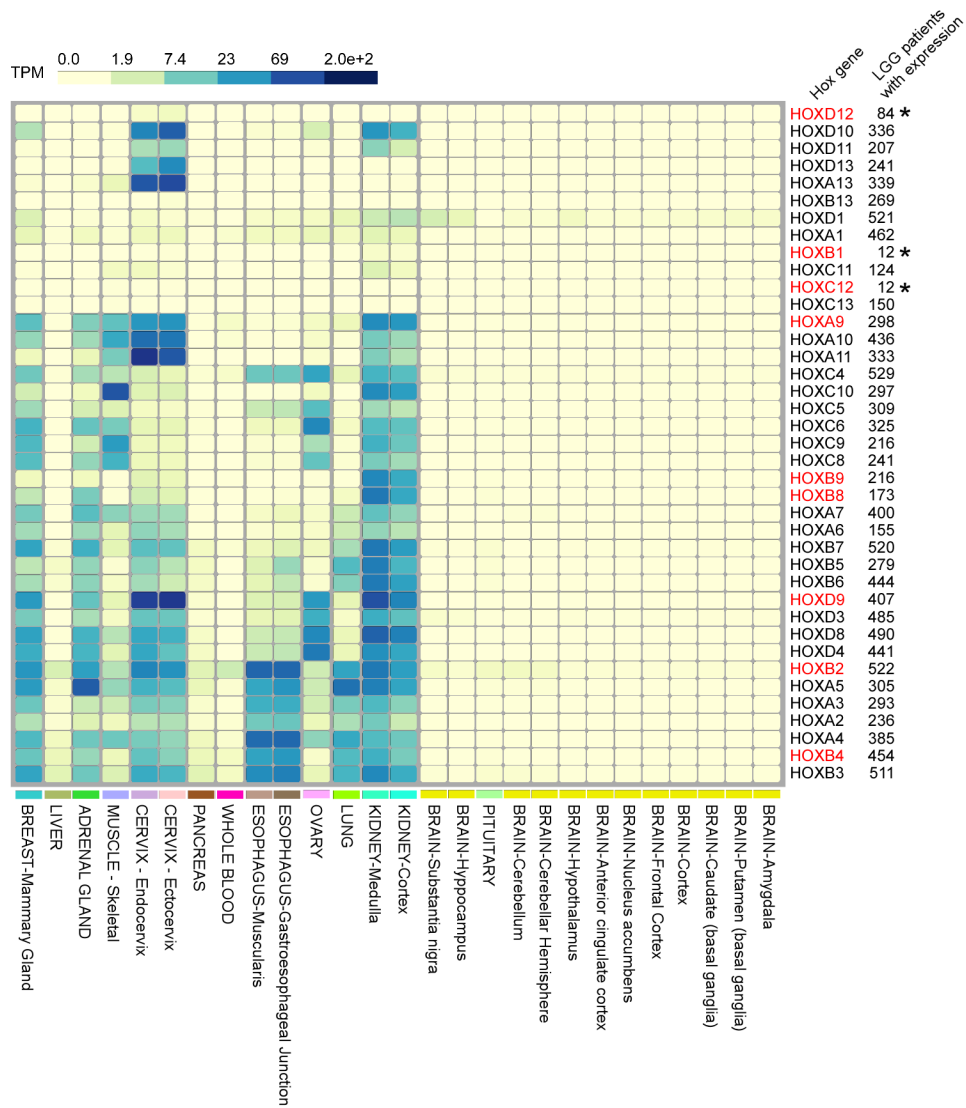

**B**

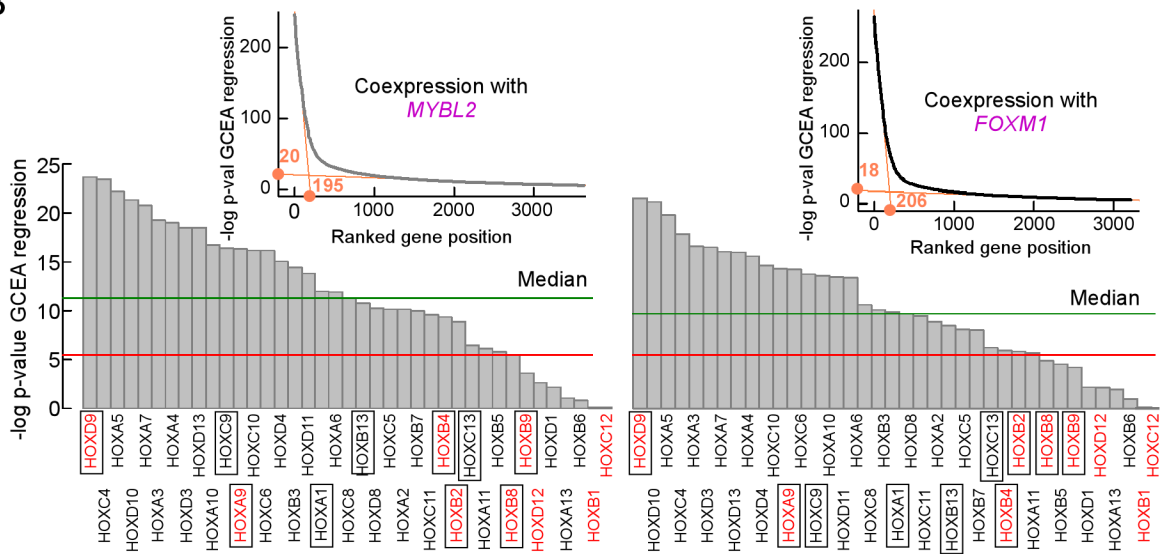

Supplementary Figure 5

**Supplementary Figure 5.** Overexpression of *Hox* genes in cancer is linked to decreased survival. **(A)** Heat map of *Hox* gene expression (<https://gtexportal.org/home/>) in adults for putative tissues of origin of tumors where overexpression was associated with poor survival (left) and number of patients with expressed *Hox* genes in LGG (right). \*, *Hox* genes expressed in fewer than 100 patients out of 532. **(B)** Bar plots from GCEA of  $-\log_{10}$  p-values for the coexpression of *Hox* genes with transcription factors *MYBL2* (left) and *FOXM1* (right). Red line, p-value threshold at 0.05; red, *Hox* genes with AcNEIL1 PICs; boxes, genes associated with poor survival in at least 3 cancer types.

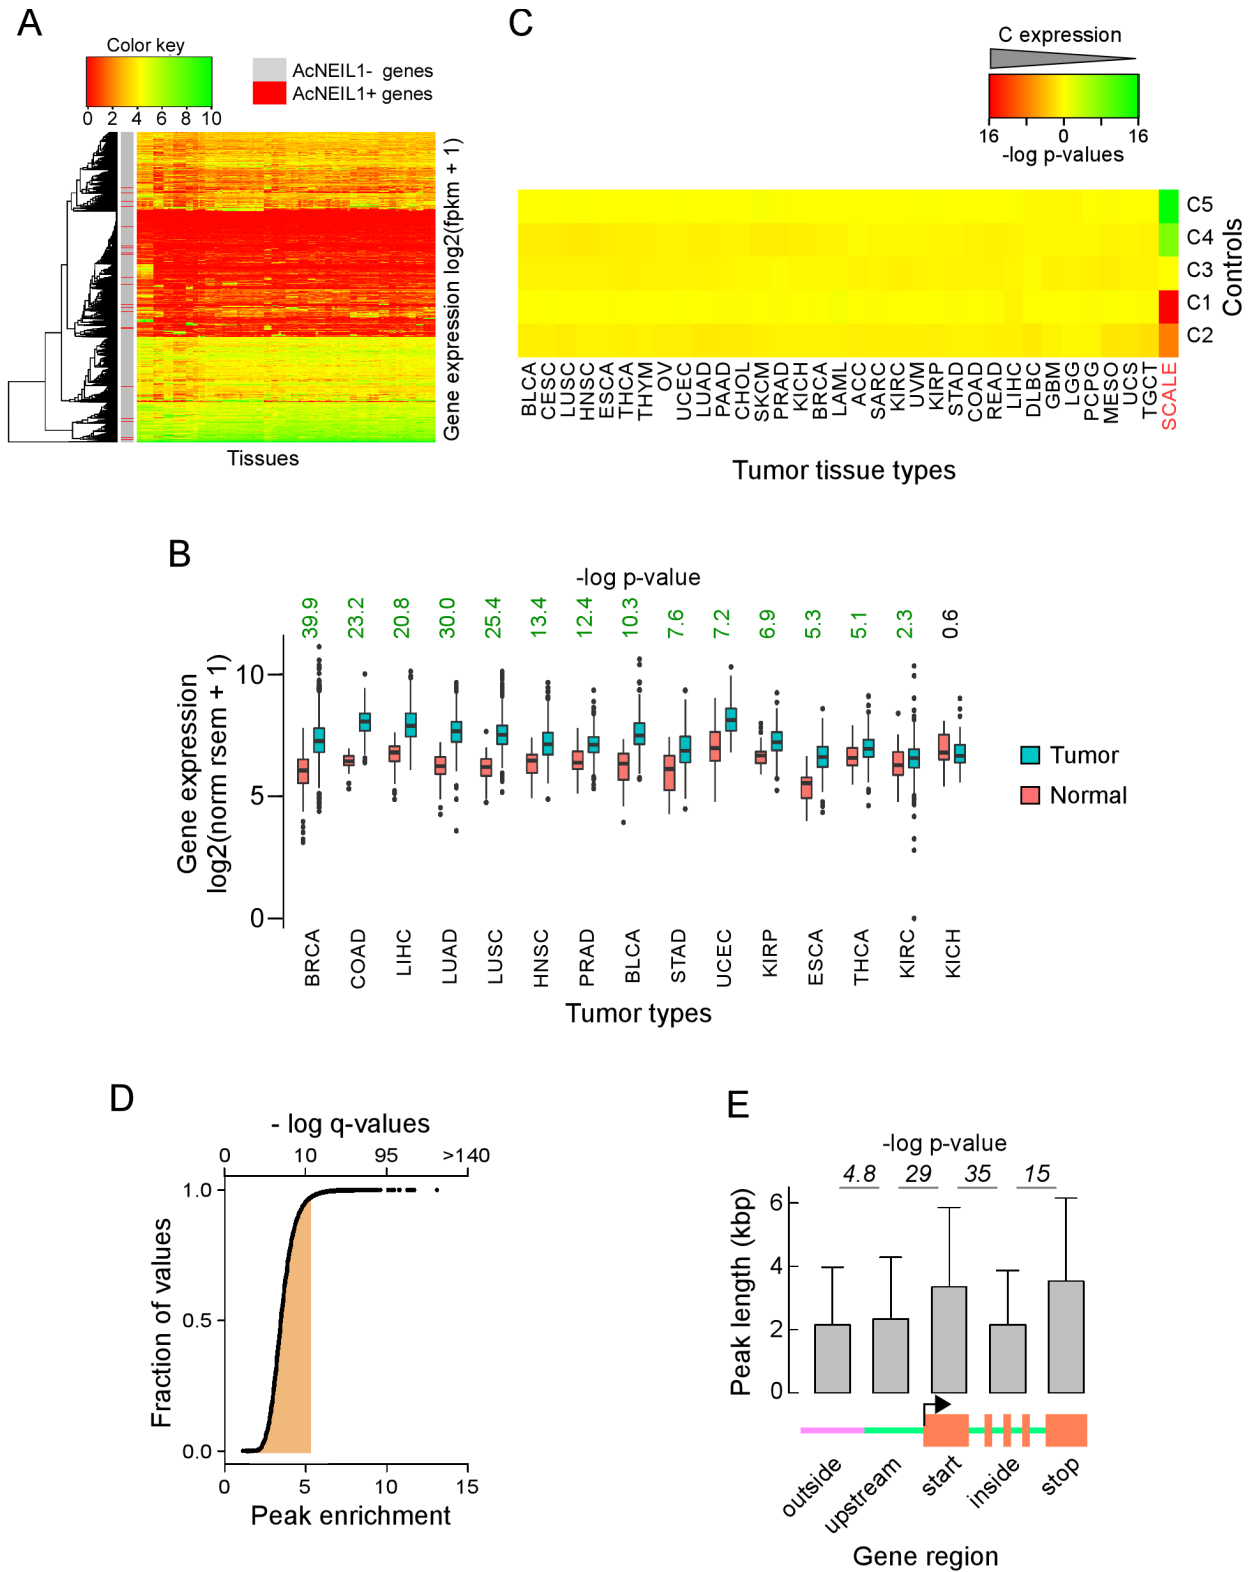

Supplementary Figure 6

**Supplementary Figure 6.** Transcription spreads AcNEIL1 along gene bodies. **(A)** Heat map and Euclidean hierarchical clustering of transcriptome profiling in 122 normal human tissue samples from <sup>15</sup>. Grey, clusters of genes without AcNEIL1 PICs within 1 kb of TSS (AcNEIL1– genes); red, clusters of genes with AcNEIL1 PICs within 1 kb of TSS (AcNEIL1+ genes). Most (21/30) discernable AcNEIL1+ clusters appear in the sector of weakly transcribed genes. **(B)** Box plots for *CBX8* gene expression in tumor and normal matched controls in TCGA. Only datasets with at least 10 controls were considered. P-values from Wilcoxon tests; green, above significant level (0.05). **(C)** 2-D hierarchical clustering of p-values from Wilcoxon tests for transcript levels in 5 control sets (each with 1000 genes chosen at random) relative to all other genes in 33 TCGA tumor types. Scale, -log p-values. **(D)** Cumulative distribution of peak enrichment (bottom scale) and q-values (top scale) for the three AcNEIL1 replicates (from “macs2 callpeak”). Orange, range of PICs from ChIPpeakAnno. **(E)** Mean and SD of PICs lengths in different genomic features. Number of peaks were: outside, 6537; upstream, 2741; start, 1005; inside, 1216; stop, 275. P-values from Welch’s t-tests between pairs (horizontal bars) of features.

chr4

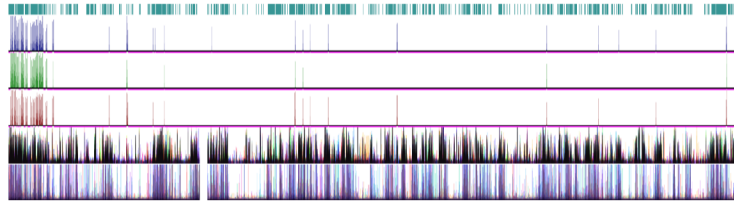

chr6

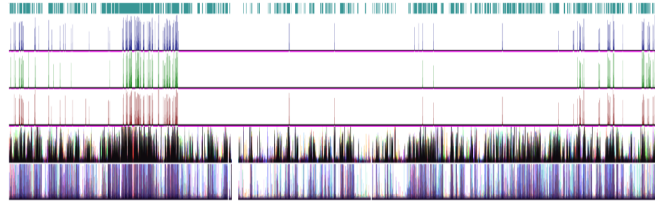

chr17

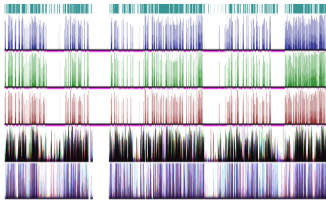

chr18

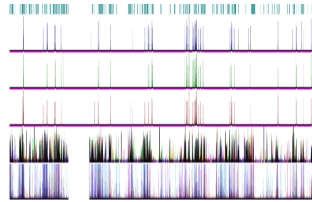

chr16

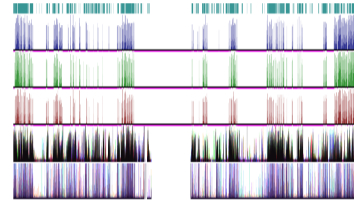

chr19

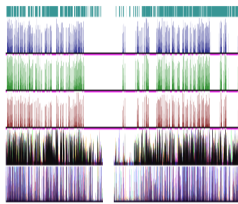

chr20

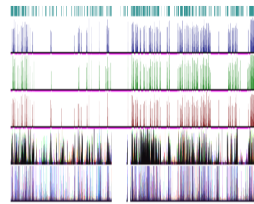

chr21

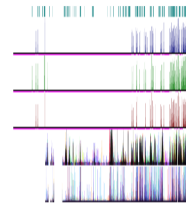

chr22

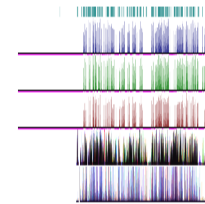

chrX

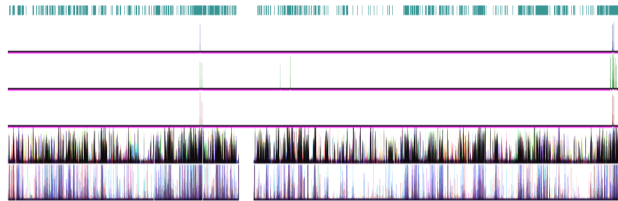

chrY

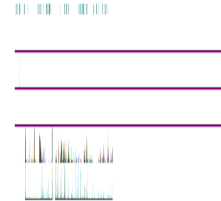

Supplementary Figure 7

**Supplementary Figure 7.** Gene-dense and highly transcribed domains are enriched in AcNEIL1. Visualization of the AcNEIL1 ChIP-seq peak replicates for selected chromosomes on the UCSC genome browser. Tracks are as in Figure 4F.

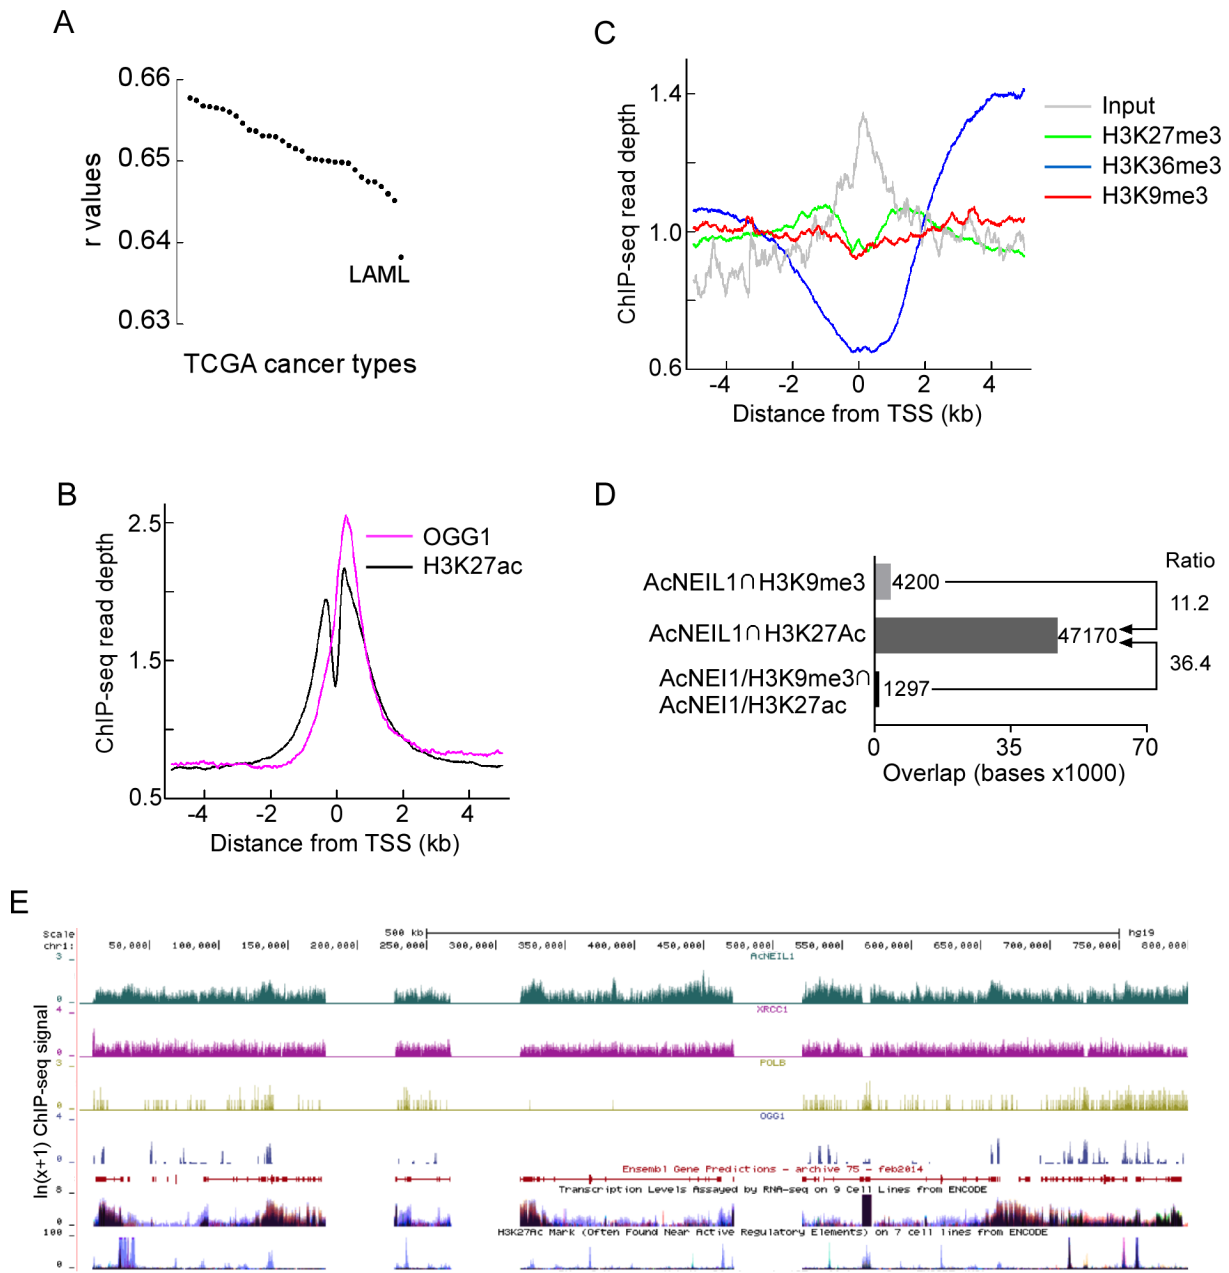

Supplementary Figure 8



**Supplementary Figure 8.** ChIP-seq shared peaks for BER components and modified histones. **(A)** Regression coefficients from correlations between ICS and transcription for the 33 TCGA cancer types. ICS as in Figure 4H; transcription is the value averaged over all patients within a given cancer type. LAML, result for the cohort of acute myeloid leukemia patients. **(B)** and **(C)** Profile of aggregate Chip-seq read depth near TSSs from the ENCODE project bigwig files in the MCF7 breast cancer cell line; Panel B, OGG1 and H3K27ac; Panel C, H3K27me3, H3K36me3, H3K9me3 and Input. **(D)** Number of overlapping bases between AcNEIL1 and H3K9me3, between AcNEIL1 and H3K27ac, and between the AcNEIL1/H3K9m3 and AcNEIL1/H3K27ac pairs from the ENCODE project narrow peak bed files in HCT116 cells. **(E)** Comparative ChIP-seq peak landscape of AcNEIL1, XRCC1, Pol  $\beta$  and OGG1 on chromosome 1 (hg19) visualized on the UCSC genome browser.

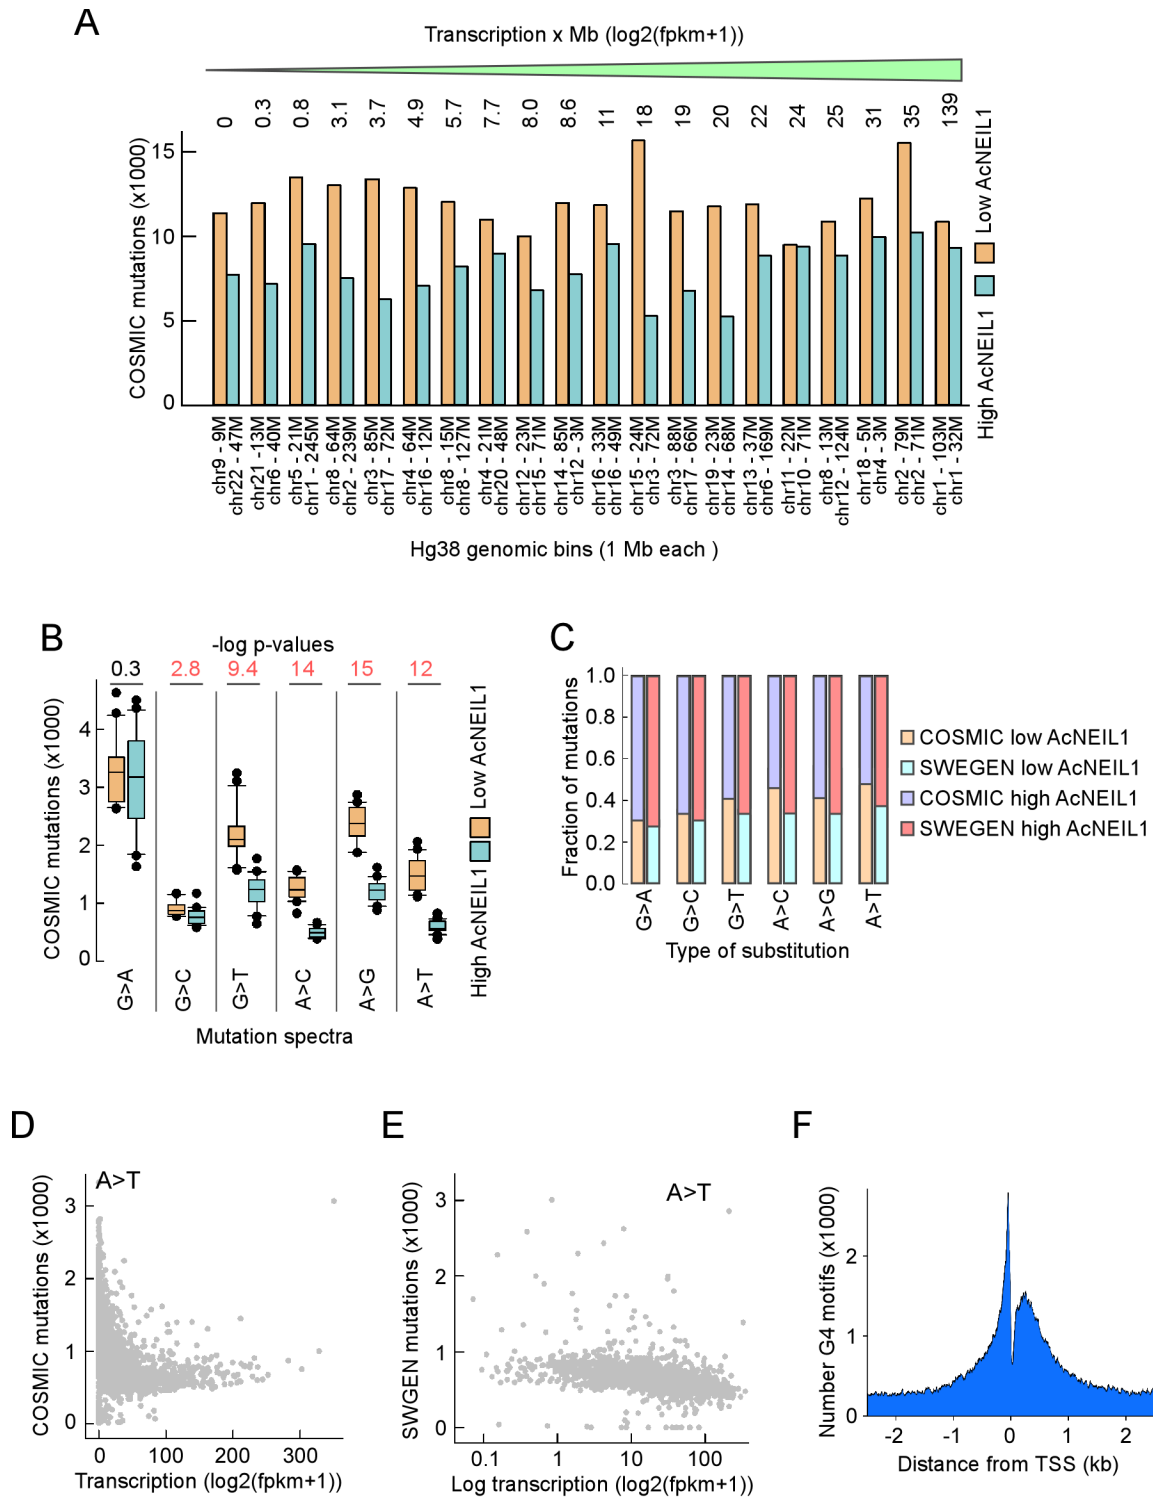

Supplementary Figure 9

**Supplementary Figure 9.** AcNEIL1 occupancy correlates with low mutation rates. **(A)** Genomic regions with low AcNEIL1 incur high mutation loads in cancer genomes. Twenty 1-Mb genomic intervals were chosen with either compound high (>950,000, turquoise) or compound low (<35,500, orange) AcNEIL1 ICS (sum of fold-enrichment signal at every bp over 1 Mb interval) for replicate 2 with matching transcriptional activity (sum of averaged  $\log_2(\text{fpkm} + 1)$  for all normal tissues for all transcripts with TSS within the 1 Mb interval, top) from (22). Number of mutations in cancer genomes were computed at each genomic interval and plotted; x-axis, starting position (M, million) of 1 Mb intervals. **(B)** Box plots of number of mutations for the 6 types of base substitution in the combined bins from **a**. Pairwise p-values from Welch's t-tests between low and high AcNEIL1-containing bins,  $n = 40$ . **(C)** Bar plot of relative fractions of base substitutions in cancer genomes and in the Swedish population. Number of base substitutions were computed in 1-Mb bins with low (<500,000) and high (>500,000) AcNEIL1, as per panel A, and plotted relative to the total. **(D)** Dot plot of number of A>T base transversions in cancer genomes as a function of transcription in 1 Mb bins. Transcription values as per panel A. **(E)** Dot plot of number of A>T base transversions in the Swedish population as a function of transcription in 1 Mb bins. Transcription values as per panel A; x-axis in log scale. **(F)** Distribution of G4 DNA-forming motifs around TSSs in hg38 annotated genes from UCSC refFlat.txt file.

**A**

|         |                                                              |     |         |                                                            |     |
|---------|--------------------------------------------------------------|-----|---------|------------------------------------------------------------|-----|
| GEN 1   | MPEGPELFIASRFVNAICKGRYFSGIVKKSVDVSKCPSVMWDSLYTIAAASRGKEIKLTL | 60  | GEN 241 | DLAKEHGSAYNEDEDTTFMSWLQCYYPNMKSI SDHNGRTIWFAGDPGLVLPKDAKMH | 300 |
| EST 1   | MPEGPELFIASRFVNAICKGRYFSGIVKKSVDVSKCPSVMWDSLYTIAAASRGKEIKLTL | 60  | EST 240 | DLAKEHGSAYNEDEDTTFMSWLQCYYPNMKSI SDHNGRTIWFAGDPGLVLPKDAKMH | 299 |
| GEN 61  | TDVEANNTPGIKGNHKKQARRLSKEAKKLDIVFTFGMSGKFTFNPVNGTPKHAHLOFFTK | 120 | GEN 301 | QGKSRKSVPKKSASESVAKVDLLSANSQISEDQDTLKEMKSRNTKKARNDIVDDVSSD | 360 |
| EST 61  | TDVEAN-TPGIKGNHKKQARRLSKEAKKLDIVFTFGMSGKFTFNPVNGTPKHAHLOFFTK | 119 | EST 300 | QGKSRKSVPKKSASESVAKVDLLSANSQISEDQDTLKEMKSRNTKKARNDIVDDVSSD | 359 |
| GEN 121 | DDNMSLCFVDTRRFQKWPPEGDWSQPGRCVILEYEQFRENVLSSKLSSEFDKPICEVML  | 180 | GEN 361 | KKRLQLQLSSKQKVENVASRTRSKI KOKLT                            | 390 |
| EST 120 | DDNMSLCFVDTRRFQKWPPEGDWSQPGRCVILEYEQFRENVLSSKLSSEFDKPICEVML  | 179 | EST 360 | KKRLQLQLSSKQKVENVASRTRSKI KOKLT                            | 389 |
| GEN 181 | NQKYFNGVGNLYRAEVLRYAGVRPF EKARNVLEQLNTDGKMSSEPDILSLCHSVAREVV | 240 |         |                                                            |     |
| EST 180 | NQKYFNGVGNLYRAEVLRYAGVRPF EKARNVLEQLNTDGKMSSEPDILSLCHSVAREVV | 239 |         |                                                            |     |

**B**

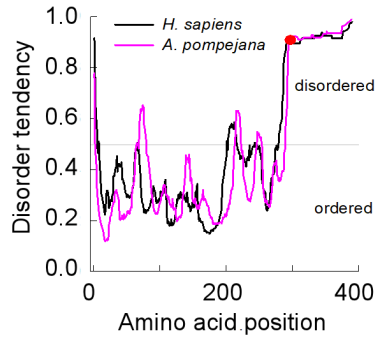

**D**

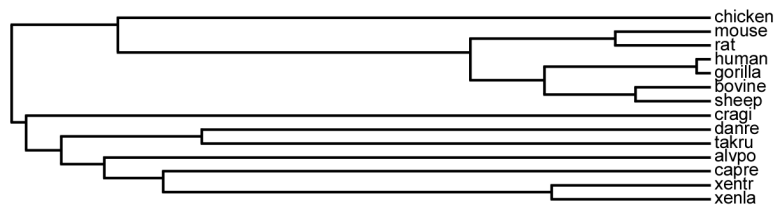

**C**

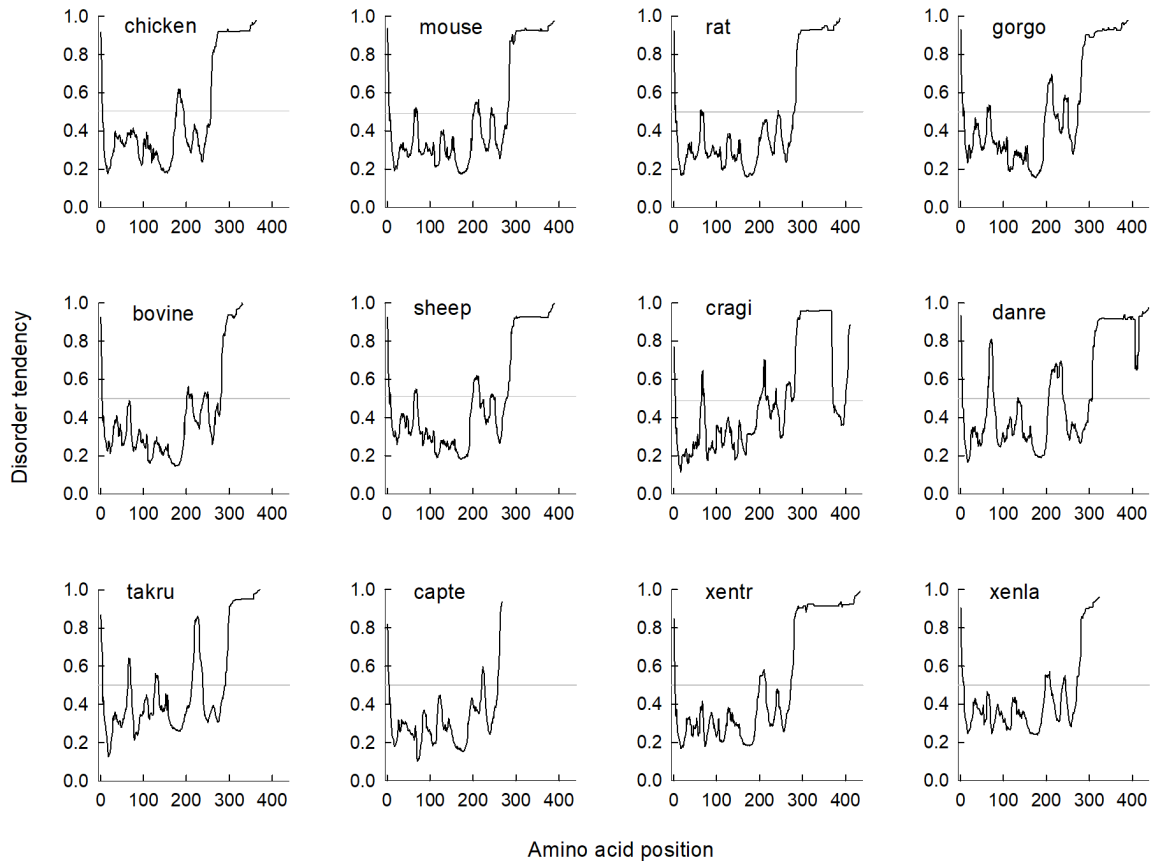

**Supplementary Figure 10**

**Supplementary Figure 10.** Evolutionary origin of AcNEIL1 acetylation center. **(A)** *Alvinella pompejana* Neil1 sequence from genomic DNA and EST. The protein sequences differ at two positions due to a tandem AACCAAC motif encoding NN (amino acids 66-67) in genomic DNA vs. a single AAC in the EST, and a G→A transition resulting in a G→S change at amino acid 219. There are 7 additional base changes between the genomic and EST nucleotide sequence, which we suspect they may arise from RNA oxidation. **(B)** Intrinsic disorder prediction for human (black) and *Alvinella pompejana* (magenta) NEIL1. Red dot, acetylation center comprising Lys<sup>296</sup>, Lys<sup>297</sup>, and Lys<sup>298</sup>. **(C)** intrinsic protein disorder scores (y axis <0.5, ordered; y axis >0.5, disordered) for Neil1 in representative species. **(D)** Phylogenetic tree based on Neil1 protein sequence alignment.

## Supplementary Table 1. Summary of ChIPQC report

| ID        | Tissue | Factor  | Condition | Replicate | Reads    | Dup% | ReadL | FragL | RelCC | SSD  | RiP% | RiBL%    |
|-----------|--------|---------|-----------|-----------|----------|------|-------|-------|-------|------|------|----------|
| AcNEIL1_1 | HCT116 | AcNEIL1 | AcNEIL1   | 1         | 21894508 | 0    | 75    | 273   | 9.9   | 0.45 | 5.7  | 4.6e-06  |
| AcNEIL1_2 | HCT116 | AcNEIL1 | AcNEIL1   | 2         | 21601029 | 0    | 75    | 165   | 4.6   | 0.51 | 7.6  | 9.3e-06  |
| AcNEIL1_3 | HCT116 | AcNEIL1 | AcNEIL1   | 3         | 23848649 | 0    | 75    | 187   | 8.9   | 0.46 | 5.7  | 0        |
| INP_1     | HCT116 | Control | AcNEIL1   | c1        | 22559745 | 0    | 74    | 190   | 13    | 0.38 | 2    | 8.9e-06  |
| INP_2     | HCT116 | Control | AcNEIL1   | c2        | 26177874 | 0    | 74    | 199   | 14    | 0.41 | 2.1  | 0.000015 |
| INP_3     | HCT116 | Control | AcNEIL1   | c3        | 23191383 | 0    | 75    | 181   | 9.6   | 0.37 | 1.8  | 4.3e-06  |

## Supplementary Table 2. Primers used in the study.

| Gene symbol and application                        | Sequence (5' ->3')                                    |
|----------------------------------------------------|-------------------------------------------------------|
| <i>MYC</i> (ChIP qPCR)                             | F: GCGAGGATGTGTCCGATTCT<br>R: CCCTTCGCACTCAATACGGA    |
| <i>CDKN1A</i> (ChIP qPCR)                          | F: CAGGCTGTGGCTCTGATTGG<br>R: TTCAGAGTAACAGGCTAAGG    |
| <i>HDAC1</i> (ChIP qPCR)                           | F: CAAACCCGCGTGTGCTTTT<br>R: CAGTCCCACCTTCGTCTGA      |
| <i>NEIL1</i> (ChIP qPCR)                           | F: CACTCCAGGATGGGAAACCC<br>R: AAGGCAGCAAAGTCCTCCTC    |
| <i>MYL1</i> (ChIP qPCR)                            | F: GCTGGGGTTTCCCAGAAGTT<br>R: AGAGCACTCTAATGCTTCTTGCT |
| <i>MAP2</i> (ChIP qPCR)                            | F: TCTATGTTCTCAAGCGCCCC<br>R: AATCGGGGGCAACAGCTTTA    |
| <i>RARβ2</i> (ChIP qPCR)                           | F: CTCTGGCTGTCTGCTTTTGC<br>R: CATGGGGGAATTCTGGTCCC    |
| Non-specific region from chromosome 17 (ChIP qPCR) | F: TACTATCCCCGTGCTTCCCA<br>R: CATTGAGGAGGGGGCAACAT    |
| <i>RARB</i> (Reverse transcription Real Time PCR)  | F: AAGTGAGCTGTTTCAGAGGCA<br>R: AATGCGTTCCGGATCCTACC   |
| <i>HPRT1</i> (Reverse transcription Real Time PCR) | F: TGACACTGGCAAAACAATGCA<br>R: GGTCCTTTTCACCAGCAAGCT  |

### Supplementary Table 3. Intersection between G4-DNA and gene mutations in 5'-UTRs in the HGMD dataset.

---

Case\_01 HGMD Accession Number: CR092368  
Gene: *IRF6*  
Coordinate at mutation: hg38:chr1:209806090 G>A  
G4 DNA sequence: CCCC**G**TCCCGCACCAGCCCTTACCTGCCAGCCC  
Distance from TSS in mRNA: -219  
Phenotype: Van der Woude syndrome  
HGMD entry tag: DM  
References: 19282774  
Notes: truncation mutation due to out-of-frame start codon

Case\_02 HGMD Accession Number: CR166119  
Gene: *TACR3*  
Coordinate at mutation: hg38:chr4:103719695 C>T  
G4 DNA sequence: C**C**GGACCCTCCCACTCACCC  
Distance from TSS in mRNA: -20  
Phenotype: normosmic congenital hypogonatropic hypogonadism (nCHH)  
HGMD entry tag: DM?  
References: 27094476  
Notes: unknown significance - patient has mutation in the GNRHR protein

Case\_03 HGMD Accession Number: CR149638  
Gene: *T*  
Coordinate at mutation: hg38:chr6:166167607 C>T  
G4 DNA sequence: C**C**CTCCCGCCGTCCCGAAGCCC  
Distance from TSS in mRNA: -16  
Phenotype: Chordoma  
HGMD entry tag: DM?  
References: 24990759  
Notes: rs3734509 - SNP overlaps with transcription factor binding sites

Case\_04 HGMD Accession Number: CR104634  
Gene: *FZD1*  
Coordinate at mutation: hg38:chr7:91264657 T>G  
G4 DNA sequence: CCCC**G**GCGCGCC**T**AGCCACCCGGGTTCTCCCCCGCGCC  
Distance from TSS in mRNA: -224  
Phenotype: Femoral neck geometry  
HGMD entry tag: FP  
References: 20051274  
Notes: rs2232157 - predicted altered transcription factor binding

Case\_05 HGMD Accession Number: CR961721  
Gene: *SERPING1*  
Coordinate at mutation: hg38:chr11:57597645 C>G  
G4 DNA sequence: CCCCC**C**CGCACCCACCTCCCTGACCC  
Distance from TSS in mRNA: -40  
Phenotype: Hereditary Angiodema  
HGMD entry tag: DM  
References: 8755917  
Notes: rs578018379 - unknown significance; patient has additional codon; deletion in *SERPING1*

Case\_06 HGMD Accession Number: CR136167  
Gene: *PICALM*  
Coordinate at mutation: hg38:chr11:86068857 C>G  
G4 DNA sequence: CCCCA**C**CCCCACGCACCCCTACCCCC  
Distance from TSS in mRNA: -77  
Phenotype: Colorectal cancer  
HGMD entry tag: DM?  
References: 23585368  
Notes: suspected predisposition to colorectal cancer; additional frameshift mutation in *TGFBR2*

Case\_07 HGMD Accession Number: CR091753  
Gene: *ZIC2*  
Coordinate at mutation: hg38:chr13:99982041 C>T  
G4 DNA sequence: GGGCT**C**G**C**AGGGCGGGCGGG  
Distance from TSS in mRNA: -24  
Phenotype: Holoprosencephaly  
HGMD entry tag: DM

References: 19177455  
Notes: unknown significance

Case\_08 HGMD Accession Number: CR016062  
Gene: *RAD51*  
Coordinate at mutation: hg38:chr15:40695330 G>C  
G4 DNA sequence: GGGGCGTTGGGGGCCGTGCGGGTCGGG  
Distance from TSS in mRNA: -98  
Phenotype: Myelodysplastic syndrome, cancer  
HGMD entry tag: DFP  
References: 25312513, 14724582, 26511493, 24930116, 11248061, 21708019  
11535547, 16398215, 17999359, 19606696, 20396943, 20454923  
20623332, 20640595, 21647442, 22611952, 24040396, 24859942  
Notes: rs1801320 - suspected increased susceptibility to myelodysplastic; syndrome and cancer

Case\_09 HGMD Accession Number: CR025892  
Gene: *CDH1*  
Coordinate at mutation: hg38:chr16:68737362 G>C  
G4 DNA sequence: CCCGCTCCAGCCC GCCCGACCCGACCGCACCC  
Distance from TSS in mRNA: -54  
Phenotype: Likely benign  
HGMD entry tag: FP  
References: Nakamura (2002) Mutat Res 502, 19  
Notes: rs5030874 - reduced promoter activity

Case\_10 HGMD Accession Number: CR132243  
Gene: *CDH1*  
Coordinate at mutation: hg38:chr16:68737367 G>T  
G4 DNA sequence: CCCGCTCCAGCCCGGCCCGACCCGACCGCACCC  
Distance from TSS in mRNA: -49  
Phenotype: Likely benign  
HGMD entry tag: FP  
References: Chen (2013) World J Gastroenterol 19, 909  
Notes: rs564350060 - increased promoter activity

Case\_11 HGMD Accession Number: CR141061  
Gene: *ELANE*  
Coordinate at mutation: hg38:chr19:852326 A>T  
G4 DNA sequence: CCCCGAGCCCCAGCCCCACCATGACCC  
Distance from TSS in mRNA: -3  
Phenotype: Cyclic neutropenia  
HGMD entry tag: DM  
References: Tidwell (2014) Blood 123, 562  
Notes: mutation activates translation from downstream initiation codons

Case\_12 HGMD Accession Number: CR063419  
Gene: *XRCC1*  
Coordinate at mutation: hg38:chr19:43575535 G>A  
G4 DNA sequence: GGGTCCGAGGGCAGGGAGAGTGGGAGGGGCGCGGG  
Distance from TSS in mRNA: -77  
Phenotype: Increased risk of HNSCC, gastric and lung cancer  
HGMD entry tag: DFP  
References: 27372710, 24470137, 21427728, 16652158, 19116388, 19662459  
20549339  
Notes: rs3213245 - decreased promoter activity, stronger Sp1 binding site

Case\_13 HGMD Accession Number: HR080003  
Gene: *SRY*  
Coordinate at mutation: hg38:chrY:2787733 C>G  
G4 DNA sequence: CCCTCAACACCCCTCAACCCCGCCC  
Distance from TSS in mRNA: -130  
Phenotype: XY sex reversal  
HGMD entry tag: DM  
References: 19694000, 9582429  
Notes: mutation in Sp1 binding site

---



**Supplementary Table 3.** There are five different classes of variant listed in HGMD. Disease-causing mutations (**DM**) are entered into HGMD where the authors of the corresponding report(s) have established that the reported mutation(s) are involved (or very likely to be involved) in conferring the associated clinical phenotype upon the individuals concerned. The DM classification may, however, also appear with a question mark (**DM?**), denoting a probable/possible pathological mutation, reported as likely to be disease-causing in the corresponding report, but where (i) the author has indicated that there may be some degree of doubt or uncertainty; (ii) the HGMD curators believe greater interpretational caution is warranted, or (iii) subsequent evidence has appeared in the literature which has called the initial putatively deleterious nature of the variant into question (e.g. a negative functional, case-control or population-scale sequencing study). The DM and DM? variant classes may include mutations that are believed to contribute to disease susceptibility in a multi-factorial manner (e.g. autism or schizophrenia), exhibit complex polygenic inheritance or possess an environmental trigger component to their pathogenicity. Disease-associated polymorphisms (**DP**) are entered into HGMD where there is evidence for a significant association with a disease/clinical phenotype along with additional evidence that the polymorphism is itself likely to be of functional relevance (e.g. as a consequence of genic location, evolutionary conservation, transcription factor binding potential, etc.), although there may be no direct evidence (e.g. from an expression study) for a functional effect. The functional polymorphisms (**FP**) class includes those sequence changes for which a direct functional effect has been demonstrated (e.g. by means of an *in vitro* reporter gene assay or alternatively by protein structure, function or expression studies), but with no disease association reported as yet. Disease-associated polymorphisms with supporting functional evidence (**DFP**) must meet both of the above criteria in that the polymorphism should not only have been reported to be significantly associated with disease, but should also display direct evidence of being of functional relevance.
